# Supplementary material for: Both ghrelin deletion and unacylated ghrelin overexpression preserve muscles in aging mice
Source: publisher site journal article supplement (doi:10.18632/aging.103802), 2020-07-26
Supplement: Supplementary file [file aging-v12i14-103802-supplementary-material-SD1.pdf]

**SUPPLEMENTARY FIGURES**

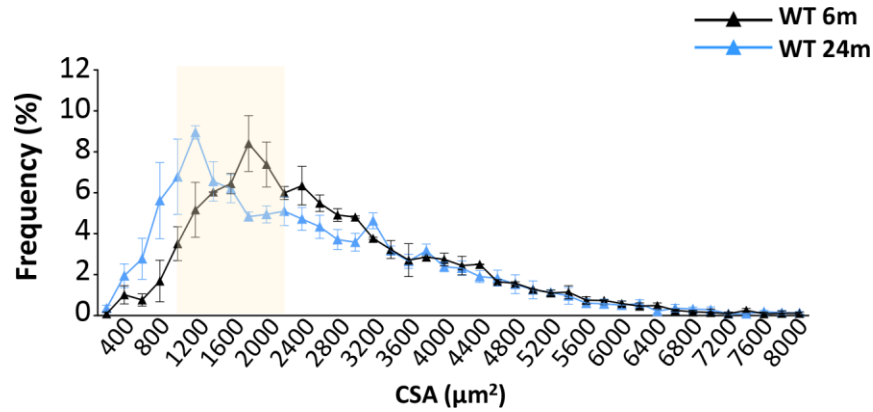

**Supplementary Figure 1. Aging-induced atrophy in WT muscles.** Cross-sectional area (CSA) frequency distribution of myofibers in GAS of young (N=2) and old (N=4) WT mice. The shadowed area of the graph represents the section of statistically significant differences among curves. Data are presented as mean ± SEM.

|   | A             | B                      | C                    | D                   | E      | F            | G                    | H                 | I                 | J                   | K                    | L             |
|---|---------------|------------------------|----------------------|---------------------|--------|--------------|----------------------|-------------------|-------------------|---------------------|----------------------|---------------|
| 1 | POS           | POS                    | NEG                  | NEG                 | BLANK  | BLC (CXCL13) | CD30 Ligand (TNFSF8) | Eotaxin-1 (CCL11) | Eotaxin-2 (CCL24) | Fas Ligand (TNFS56) | Fractalkine (TNFSF8) | GCSF (CCL11)  |
| 2 |               |                        |                      |                     |        |              |                      |                   |                   |                     |                      |               |
| 3 | GM-CSF        | IFN-gamma              | IL-1 alpha (IL-1 F1) | IL-1 beta (IL-1 F2) | IL-2   | IL-3         | IL-4                 | IL-6              | IL-9              | IL-10               | IL-12 p70            | IL-12 p40/p71 |
| 4 |               |                        |                      |                     |        |              |                      |                   |                   |                     |                      |               |
| 5 | IL-13         | IL-17A                 | I-TAC (CXCL1)        | KC (CXCL1)          | Leptin | LIX          | XCL1                 | MCP-1 (CCL2)      | M-CSF             | MIG (CXCL9)         | MIP-1 alpha (CCL3)   | MIP-1 gamma   |
| 6 |               |                        |                      |                     |        |              |                      |                   |                   |                     |                      |               |
| 7 | RANTES (CCL5) | SDF-1 alpha (CXCL12 a) | I-309 (TCA-3/CCL1)   | TECK (CCL25)        | TIMP-1 | TIMP-2       | TNF alpha            | TNF RI (TNFRS1A)  | TNF RII (TNFRS1A) | BLANK               | BLANK                | POS           |
| 8 |               |                        |                      |                     |        |              |                      |                   |                   |                     |                      |               |

**Supplementary Figure 2. Array map of the Mouse Inflammation Antibody Array.** Each antibody is spotted in duplicate vertically.
